# Supplementary material for: Impact of Moringa oleifera Seed-Derived Coagulants Processing Steps on Physicochemical, Residual Organic, and Cytotoxicity Properties of Treated Water
Source: MDPI journal article supplement (doi:10.3390/w14132058), 2022-06-27
Supplement: s1 [file s1]

Archive with 1 entries (1 files):
- water-1761993-supplementary.pdf
