# Supplementary material for: Impact of Moringa oleifera Seed-Derived Coagulants Processing Steps on Physicochemical, Residual Organic, and Cytotoxicity Properties of Treated Water
Source: MDPI journal article supplement (doi:10.3390/w14132058), 2022-06-27
Supplement: s1 [file s1 › water-1761993-supplementary.pdf]

## Supplementary Information

for the manuscript

### Impact of *Moringa oleifera* seed-derived coagulants preparation steps on physicochemical, residual organic, and cytotoxicity properties of treated water

Figures S1 to S3

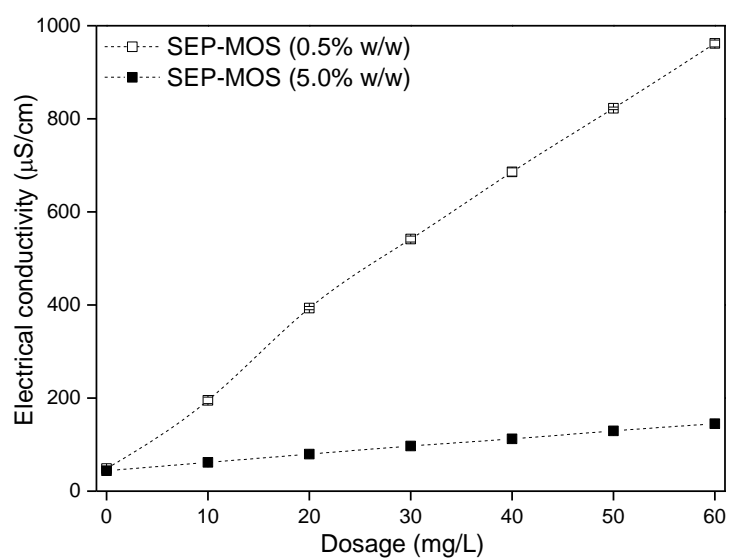

**Figure S1.** Comparison of the effect on the electrical conductivity of treated water using saline extract (NaCl 1 M) in the suspension prepared at 5.0% (w/w) versus 0.5% (w/w), based on *M. oleifera* seed-derived coagulant SEP-MOS.

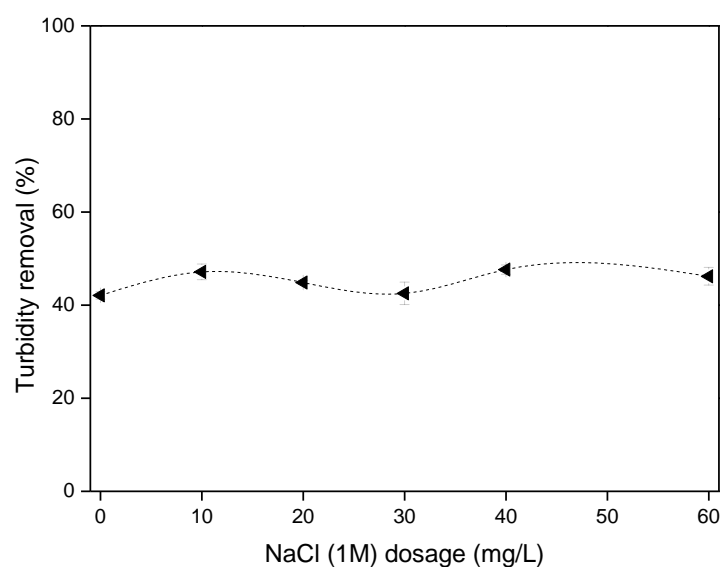

**Figure S2.** Residual turbidity in jar tests using 1 M NaCl as coagulant against kaolin suspensions.

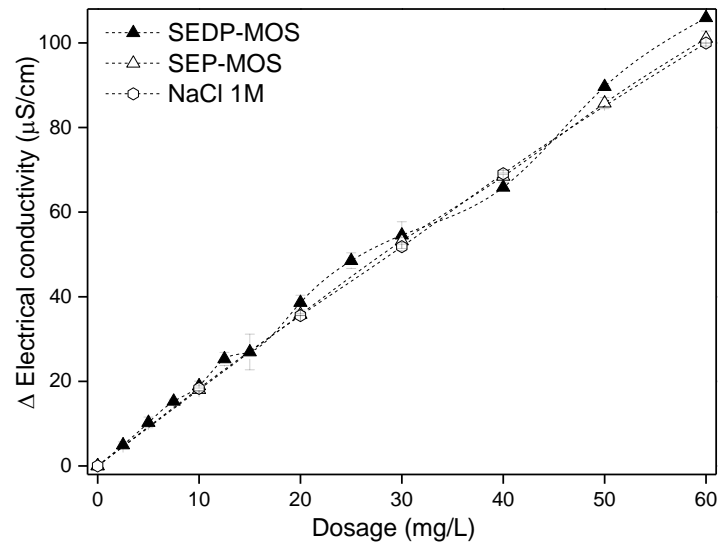

**Figure S3.** Electrical conductivity variation as a function of *M. oleifera* seed-derived coagulants (SEP-MOS and SEDP-MOS) and NaCl 1M dosages in jar tests after coagulation, flocculation, and sedimentation. Initial conductivity was  $49.1 \pm 4.4 \mu\text{S/cm}$ .
